# Supplementary material for: Efficient in vivo siRNA delivery by stabilized d-peptide-based lipid nanoparticles
Source: Royal Society of Chemistry journal article supplement (doi:10.1039/c6ra25862j), 2017-01-01

***Supporting Information***

Efficient in vivo siRNA delivery by stabilized D-peptide-based lipid nanoparticles

Tsogzolmaa Ganbold<sup>1</sup>, Gerile Gerile<sup>1</sup>, Hai Xiao<sup>1</sup>, and Huricha Baigude\*

*School of Chemistry & Chemical Engineering, Inner Mongolia University, 235 West*

*College Road, Hohhot, Inner Mongolia, 010020, PR China*

<sup>1</sup>These authors contributed equally to this work.

\*Correspondence to:

Dr. Huricha Baigude, School of Chemistry & Chemical Engineering, Inner Mongolia

University, 235 West College Road, Hohhot, Inner Mongolia Autonomous Region,

010020 P.R.China, Fax: +86-471-4993165, e-mail: [hbaigude@imu.edu.cn](mailto:hbaigude@imu.edu.cn)

Figure SI-1. <sup>1</sup>H NMR spectrum of D-DoAo2 in DMSO-d<sub>6</sub>.

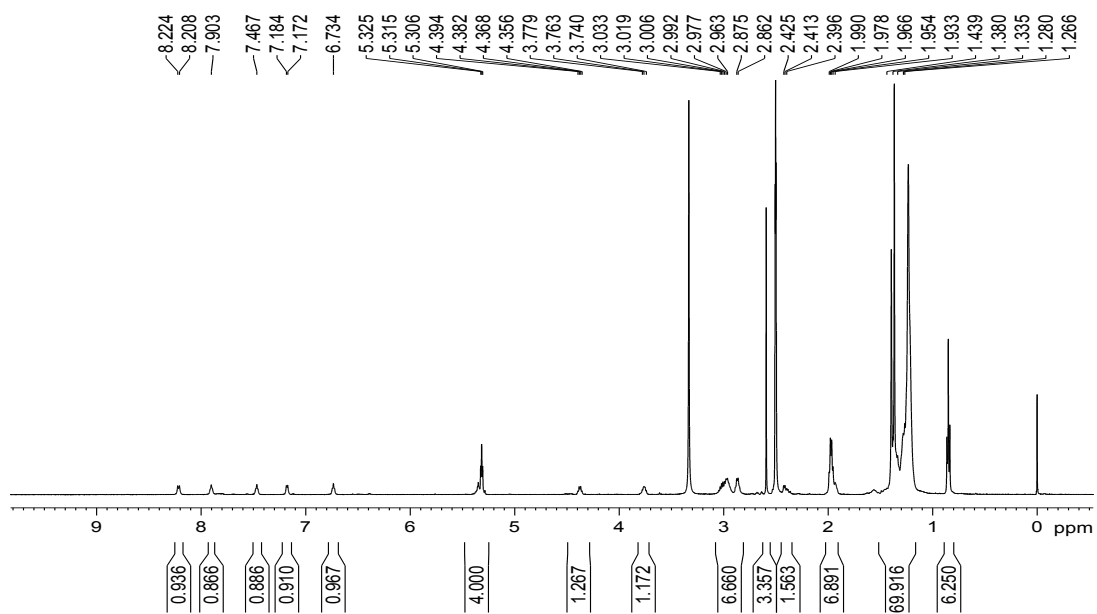

Figure SI-2. MS spectrum of D-DOAo2.

T-D-DOGO2 #48-55 RT: 1.09-1.27 AV: 8 SB: 7 0.46-0.62 NL: 6.93E5  
T: + c ESI Full ms [50.00-2000.00]

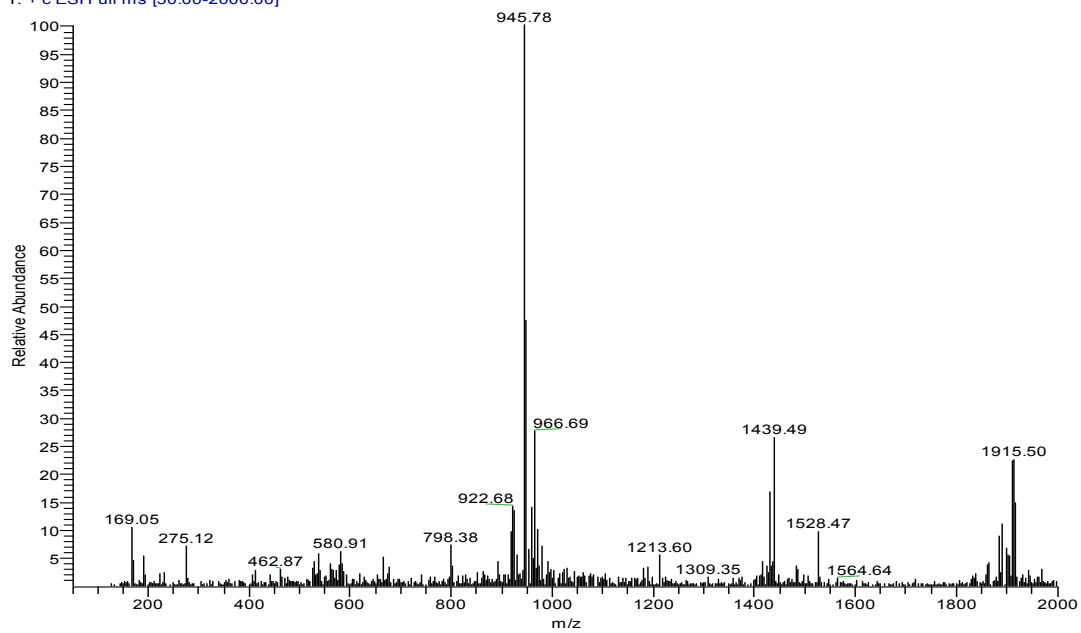

Figure SI-3. <sup>1</sup>HNMR sepctrum of D-DoGo2 in DMSO-d6.

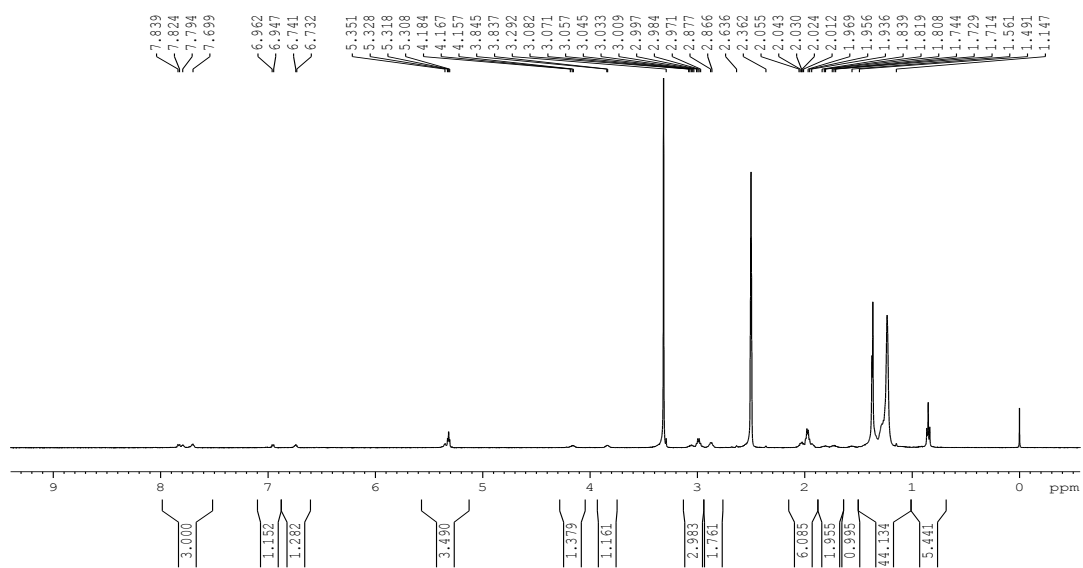

Figure SI-4. MS spectrum of D-DoGo2.

D-DOGO2 #41-44 RT: 1.09-1.17 AV: 4 SB: 6 1.06-1.20 NL: 3.27E6  
T: + c ESI Full ms [50.00-2000.00]

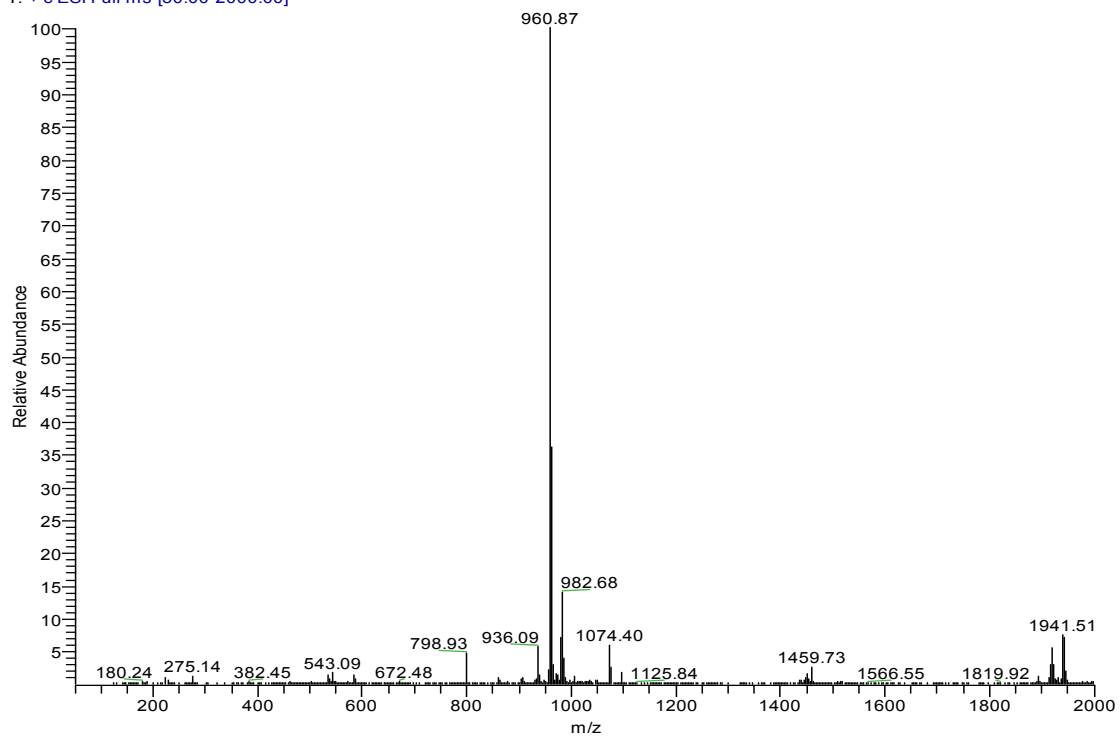

Supplement: c6ra25862j1.pdf [file c6ra25862j1.pdf]
